# Supplementary material
Source: PubMed Central journal article supplement (PMC1859965)

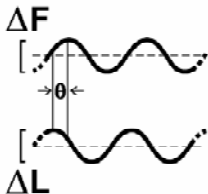

Viscous Modulus  
( $\text{kN/m}^2$ )

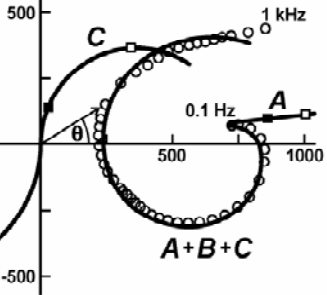

Elastic Modulus  
( $\text{kN/m}^2$ )

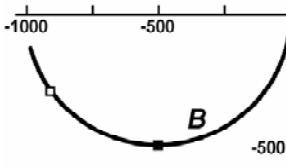

Supplement: pnas_0604972103_1.pdf [file pnas_0604972103_1.pdf]

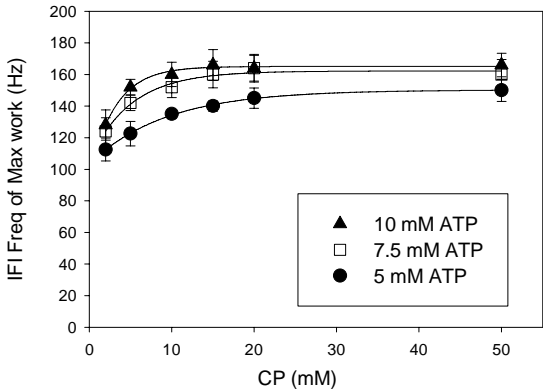

Supplement: pnas_0604972103_2.pdf [file pnas_0604972103_2.pdf]

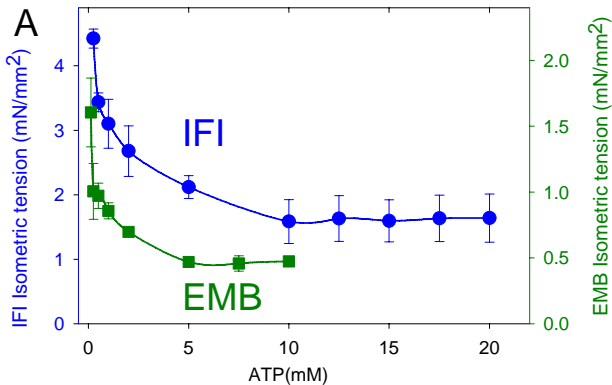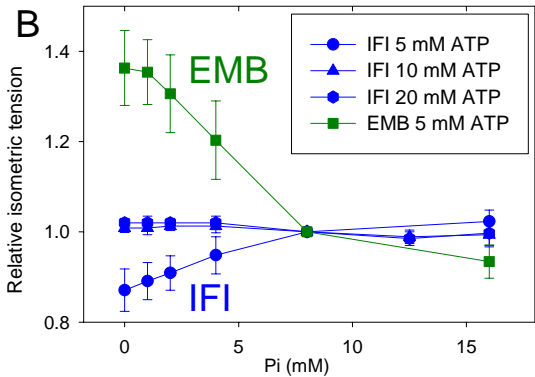

Supplement: pnas_0604972103_3.pdf [file pnas_0604972103_3.pdf]

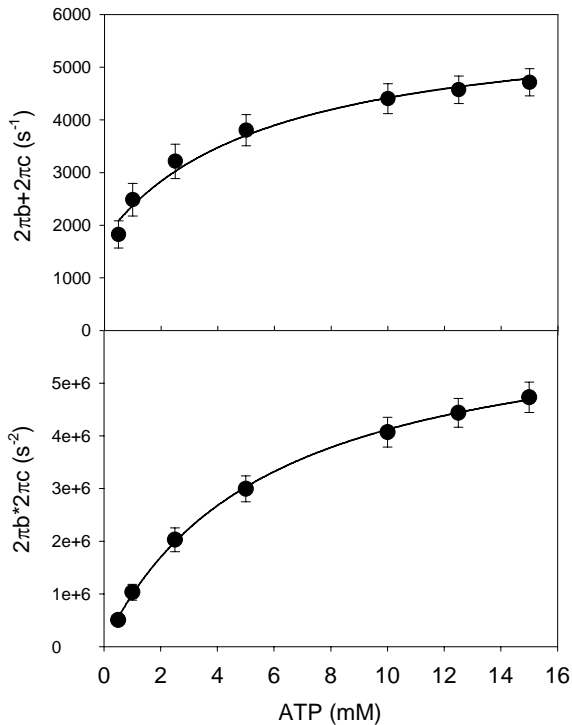

Supplement: pnas_0604972103_4.pdf [file pnas_0604972103_4.pdf]
